# Supplementary material for: Assemblies of polyvinylpyrrolidone-capped tetrahedral and spherical Pt nanoparticles in polyelectrolytes: hydrogen underpotential deposition and electrochemical characterization
Source: Royal Society of Chemistry journal article supplement (doi:10.1039/c3cp51061a), 2013-01-01
Supplement: c3cp51061a.pdf [file c3cp51061a.pdf]

## Supplementary Information

### Assemblies of Polyvinylpyrrolidone-capped Tetrahedral and Spherical Pt Nanoparticles in Polyelectrolyte: Hydrogen Underpotential Deposition and Electrochemical Characterization

Sarah Jaber,<sup>a</sup> Pamela Nasr,<sup>a</sup> Yan Xin,<sup>b</sup> Fatima Sleem,<sup>a</sup> and Lara I. Halaoui<sup>a\*</sup>

a) Chemistry Department, American University of Beirut, Beirut 110236 Lebanon, and b) National High Magnetic Field Laboratory, Florida State University, Tallahassee, Florida 32306

\*Corresponding author: [Lara.Halaoui@aub.edu.lb](mailto:Lara.Halaoui@aub.edu.lb)

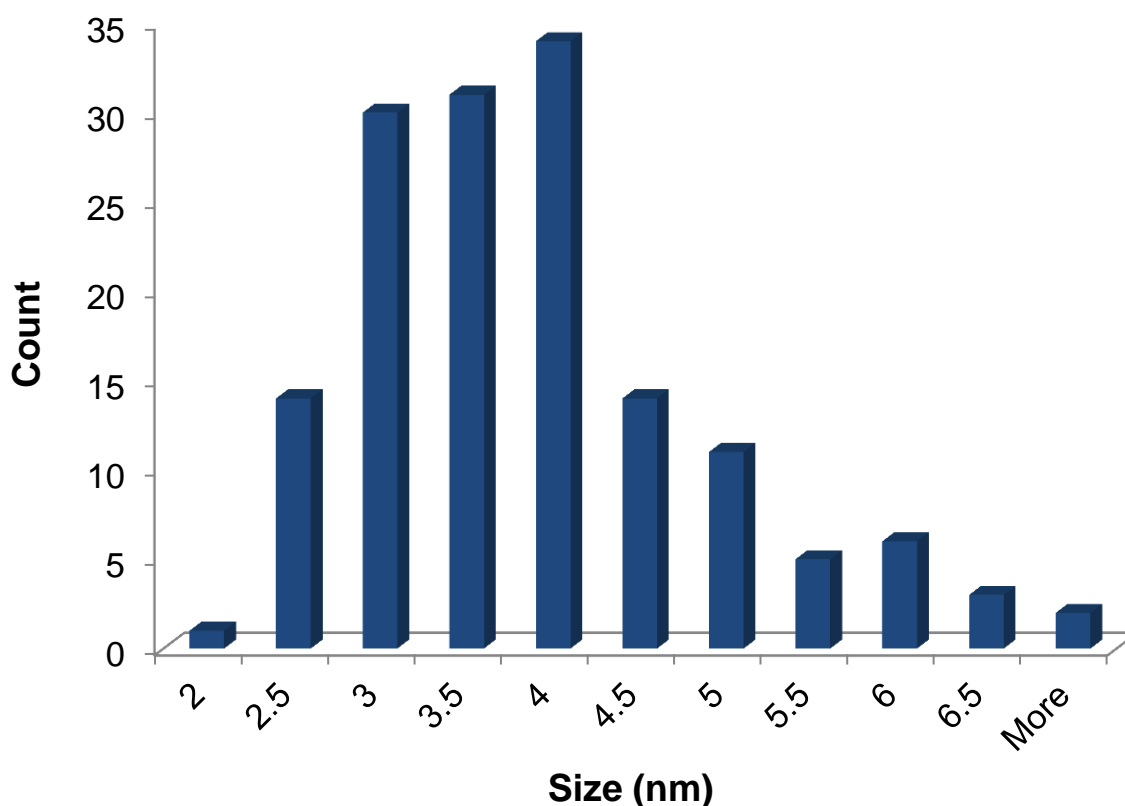

**Figure SI.1** Histogram showing the size distribution of shapes (spherical/ellipsoidal, some rod-like or undefined) other than tetrahedral resulting from the preparation of PVP-TH-Pt NPs. The average size is  $3.66 \pm 1.02$  nm ( $N=151$ ) by averaging the long and short axes.

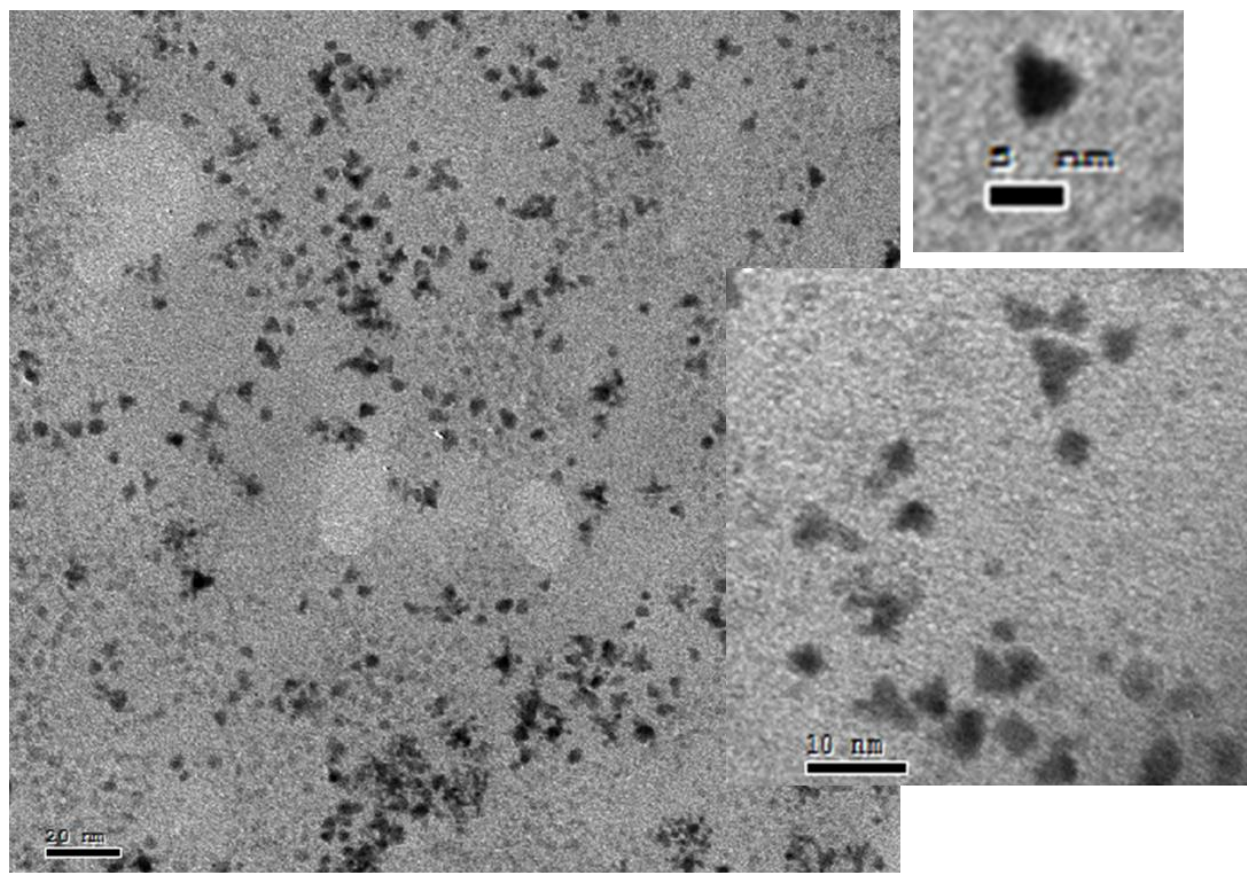

**Figure SI.2** TEM images of PVP-TH-Pt NPs stored in solution for 4 months at 4 °C drop cast (of 8  $\mu\text{L}$  of solution) on C/Cu grid.

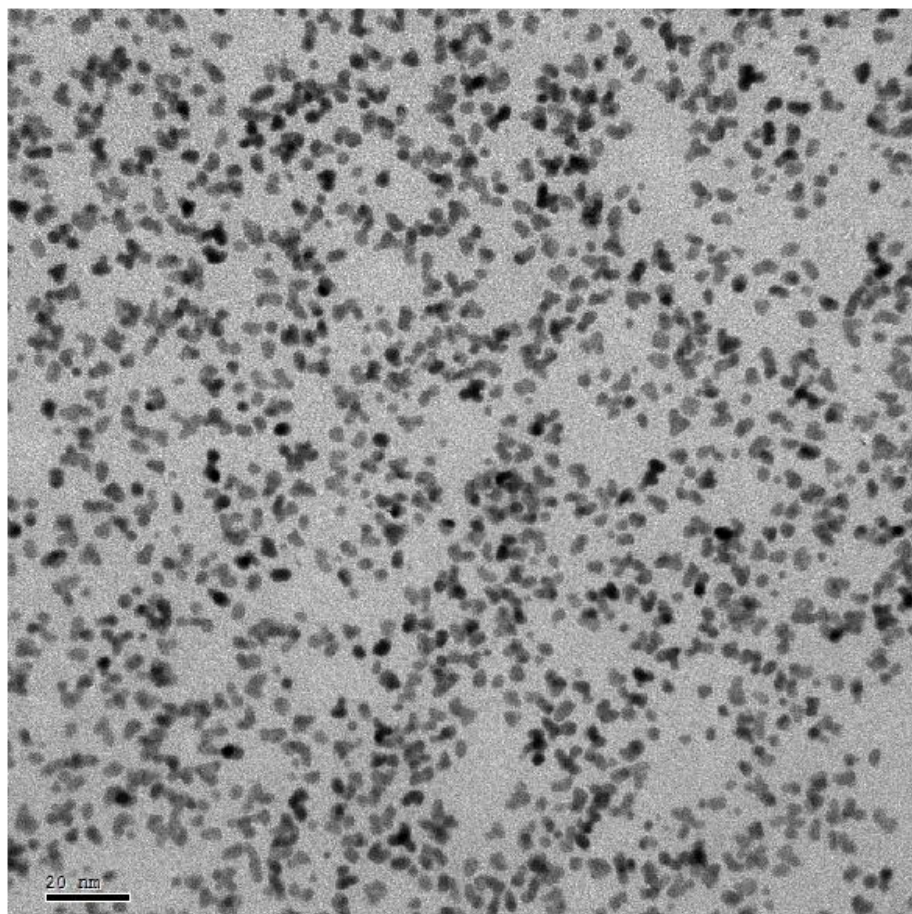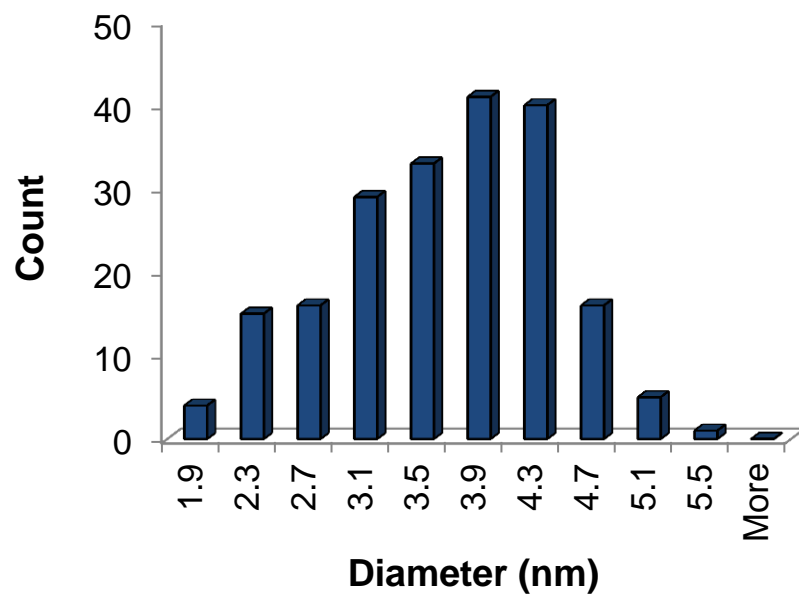

**Figure SI.3** TEM image and size distribution (N=200) of PVP-S-Pt NPs prepared by reduction of Pt(II) ( $K_2PtCl_4$ ) with ethanol. The film is (PDDA/PVP-S-Pt)<sub>1</sub> on SiO<sub>x</sub>/Cu grid.

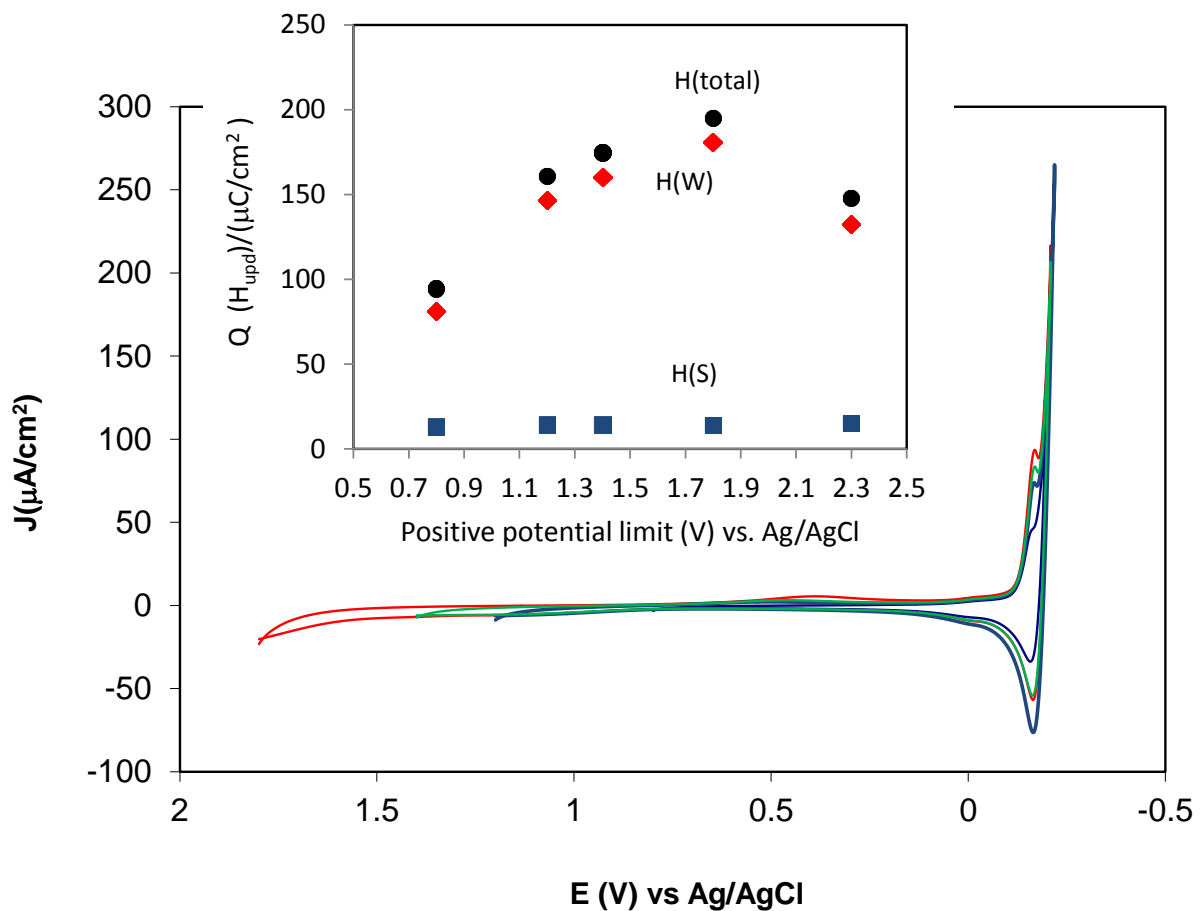

**Figure SI.4** CVs in deaerated 1 M  $\text{H}_2\text{SO}_4$  at  $(\text{PDDA}/\text{PVP}\text{-TH}\text{-Pt})_4$  with increasing the positive scan limit (first scan from 0.8 V, last scan from 1.8 V). The inset shows plots of the charge for  $H(\text{S})$ ,  $H(\text{W})$ , and total charge for  $H_{\text{upd}}$  vs. the positive potential scan limit. Scan rate is 20 mV/s.

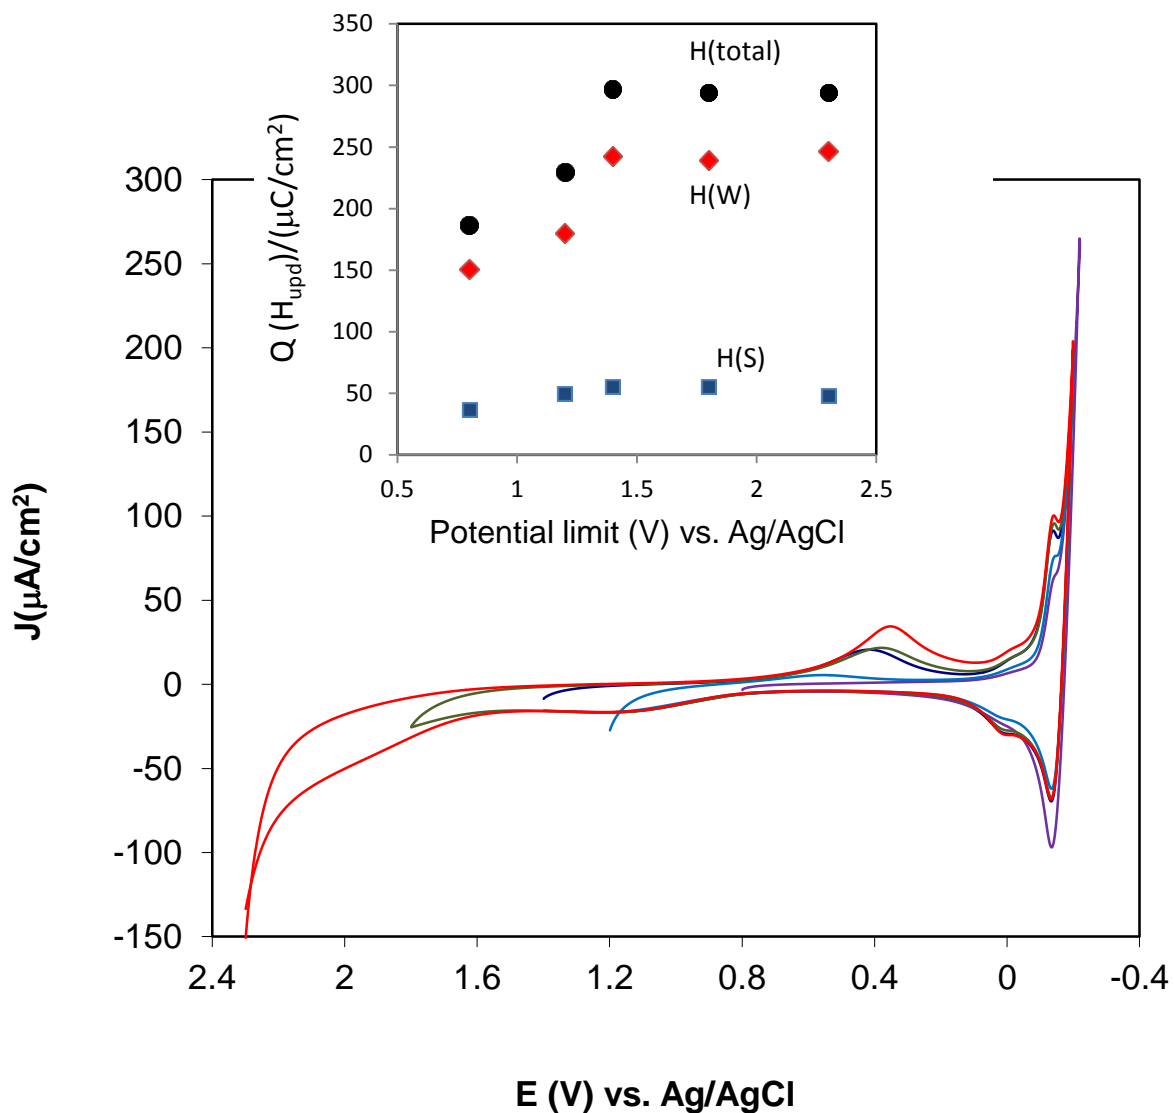

**Figure SI.5** CVs in deaerated 1 M  $\text{H}_2\text{SO}_4$  at  $(\text{PDDA}/\text{PVP-S-Pt})_4$  with increasing the positive scan limit (first scan from 0.8 V, last scan from 2.3 V). The inset shows plots of the charge for  $H(\text{S})$ ,  $H(\text{W})$ , and total charge for  $H_{\text{upd}}$  vs the positive potential scan limit. Scan rate is 20 mV/s.

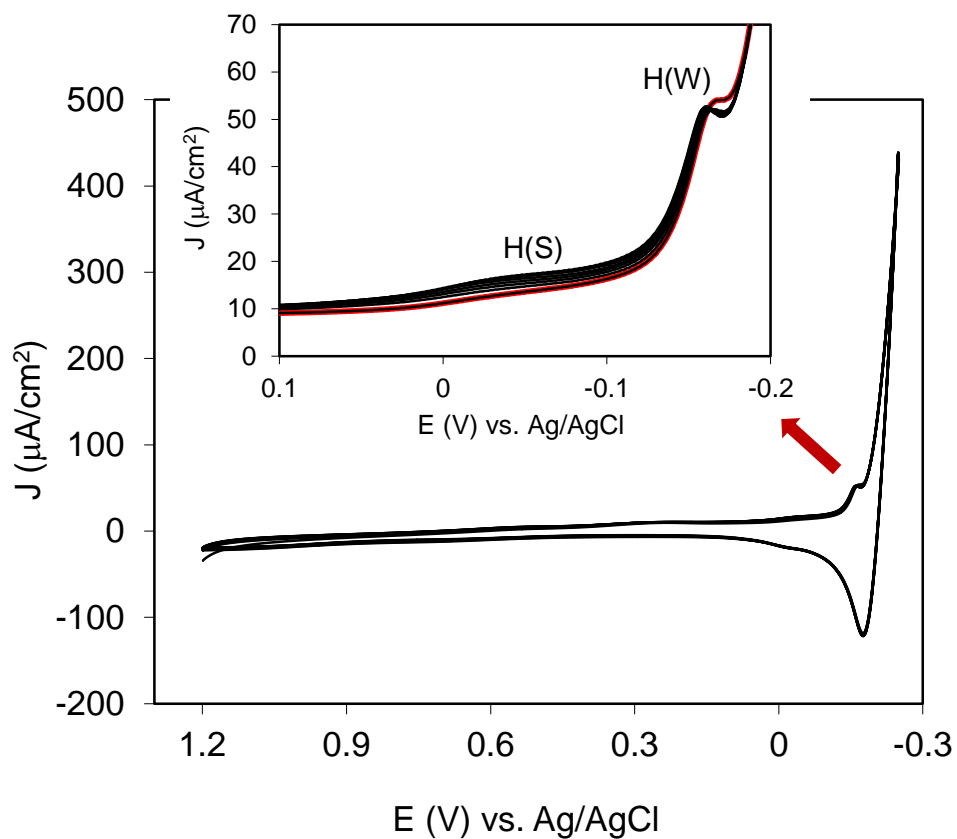

**Figure SI.6** 10 consecutive cyclic voltammograms at (PDDA/PVP-TH-Pt NP)<sub>4</sub> in 1 M H<sub>2</sub>SO<sub>4</sub> at 20 mV/s. The line marked in red in the inset is the first scan, followed by nine scans in black. (Move to SI)

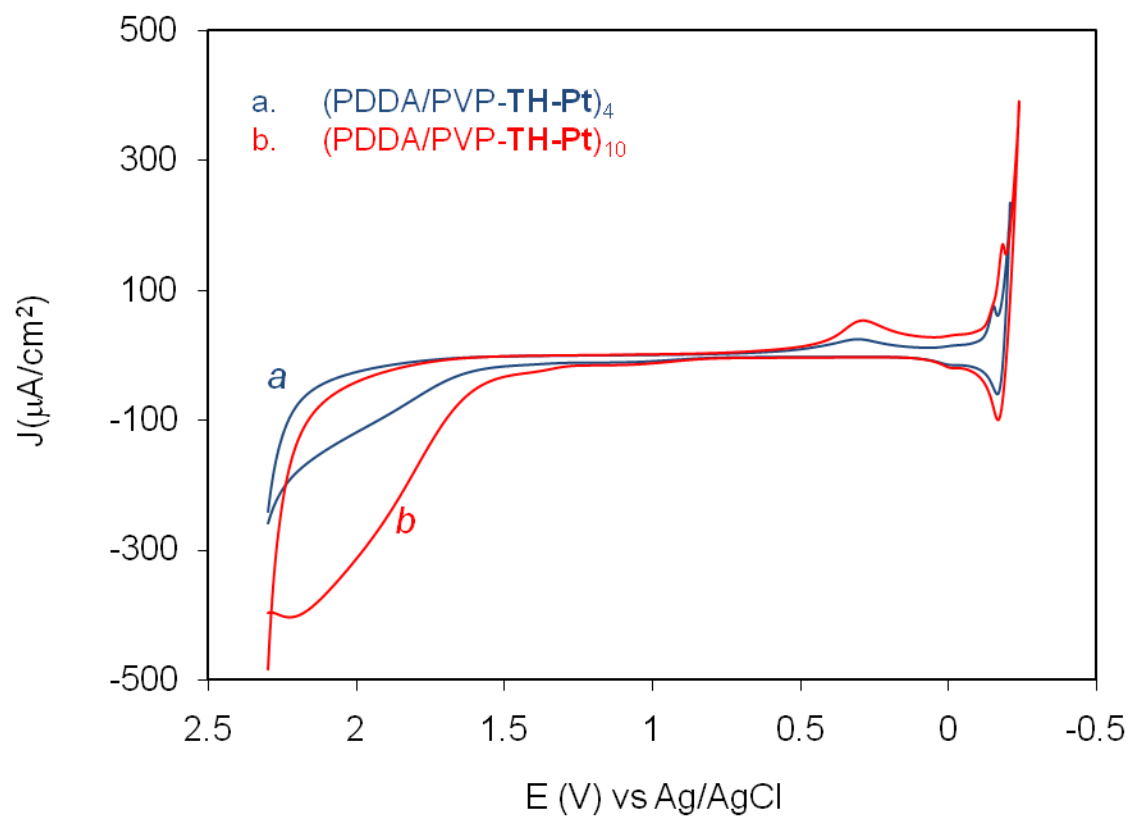

**Figure SI.7** Cyclic voltammograms in deaerated 1 M  $\text{H}_2\text{SO}_4$  at (a)  $(\text{PDDA}/\text{PVP}\text{-}\text{TH}\text{-}\text{Pt})_4$  and (b)  $(\text{PDDA}/\text{PVP}\text{-}\text{TH}\text{-}\text{Pt})_{10}$  scanned from 2.3 V. Scan rate is 20 mV/s.

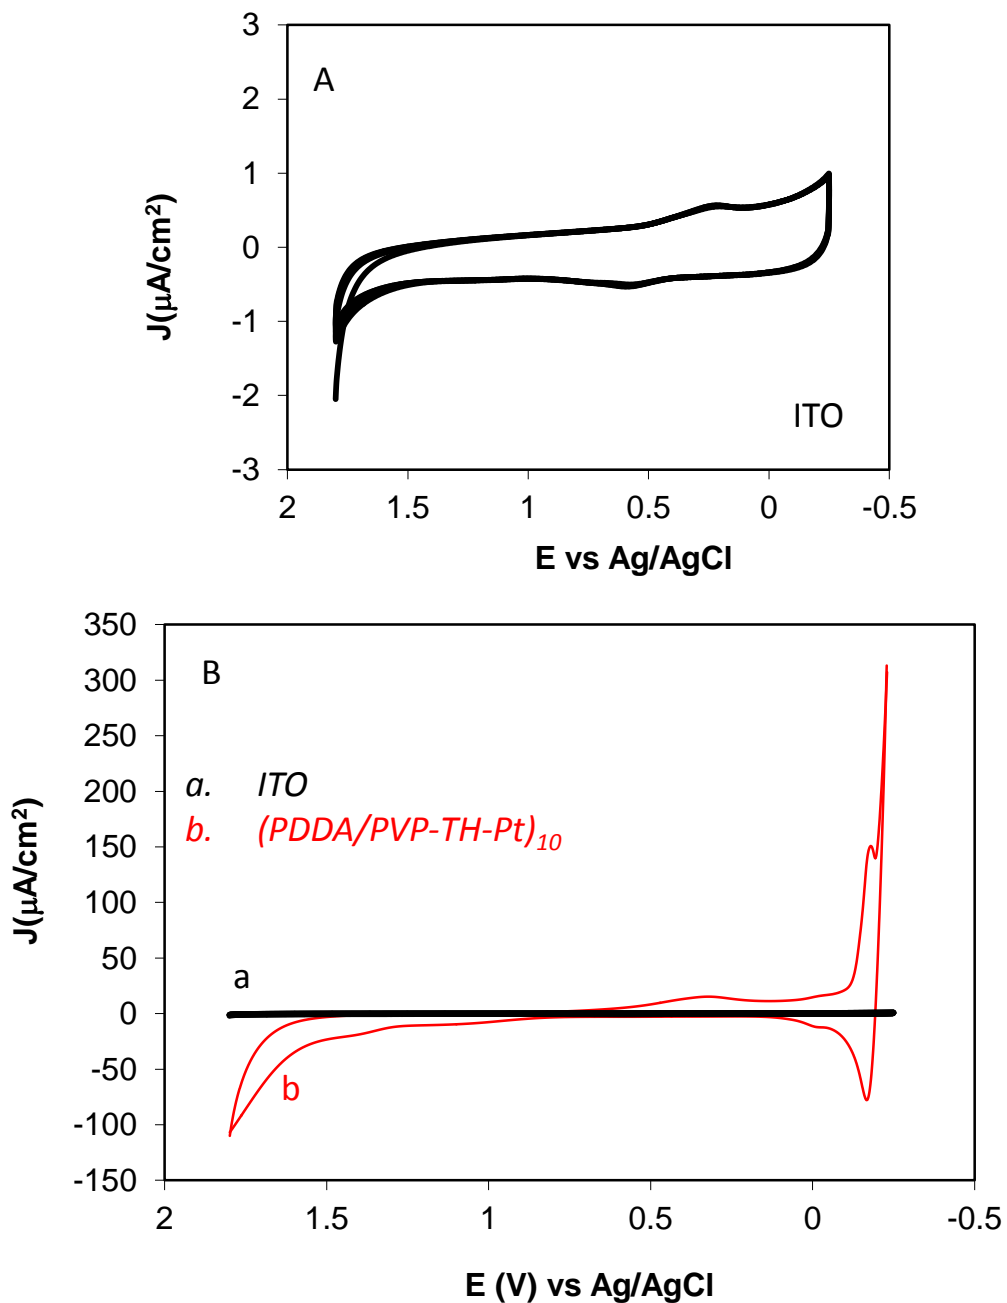

**Figure SI.8** (A) 5 cyclic voltammograms acquired at an ITO electrode scanned consecutively between 1.8 V and -0.25 V in 1 M  $\text{H}_2\text{SO}_4$  at 20 mV/s. (B) 5 CVs at ITO (a) and a CV at  $(\text{PDDA}/\text{PVP-TH-Pt})_{10}$  (b) acquired between 1.8 V and -0.25 V in 1 M  $\text{H}_2\text{SO}_4$  at 20 mV/s. The scans started at the positive limit.



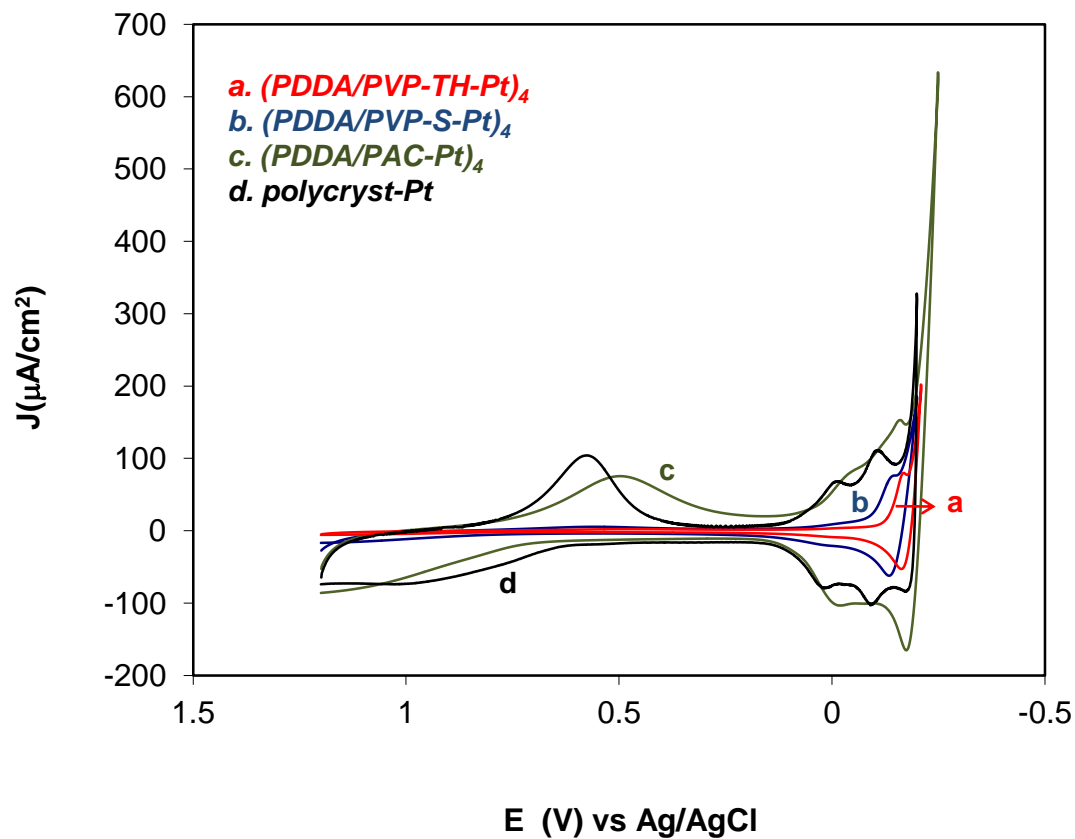

**Figure SI.9** CVs in deaerated 1 M  $\text{H}_2\text{SO}_4$  at (PDDA/PVP-TH-Pt)<sub>4</sub>, (PDDA/PVP-S-Pt)<sub>4</sub>, and (PDDA/PAC-Pt)<sub>4</sub> and at a polycryst-Pt disk electrode. Scan rate is 20 mV/s.

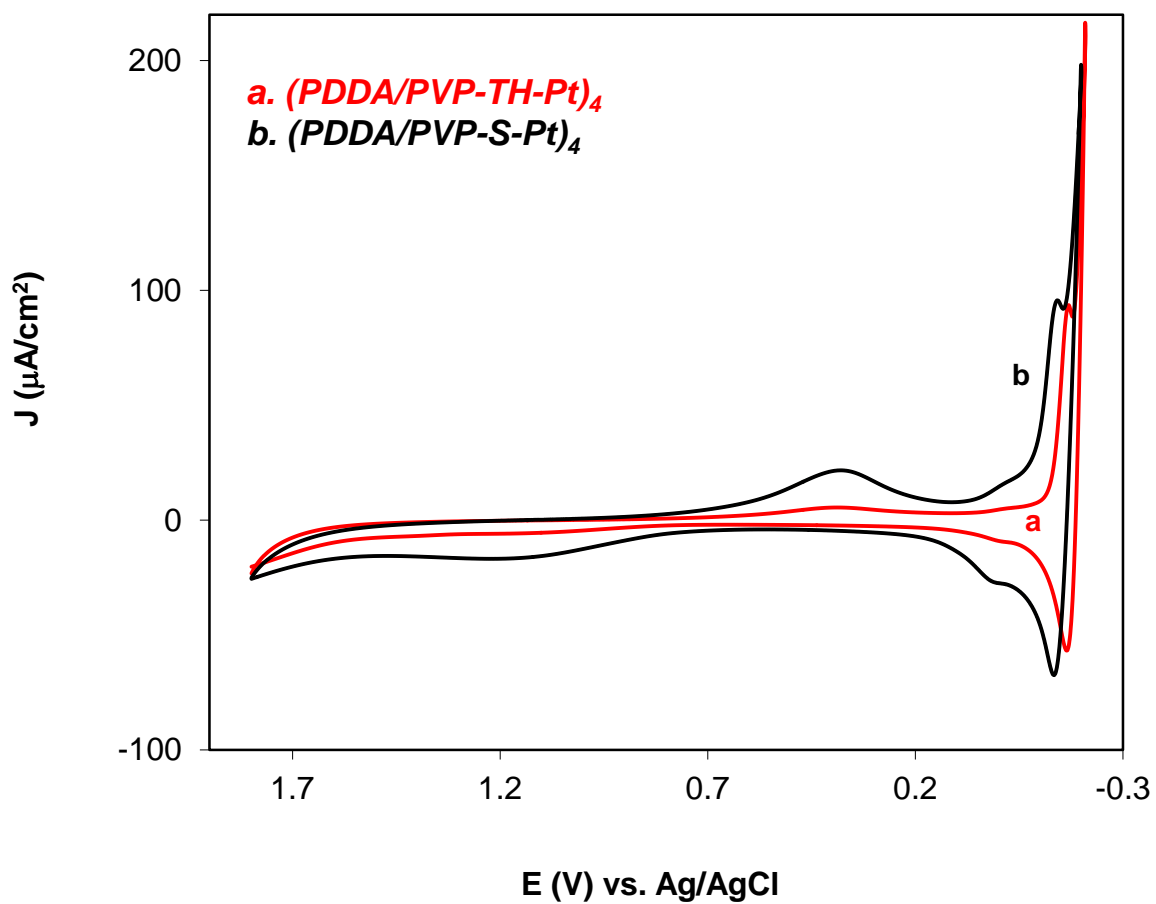

**Figure SI.10** CVs in deaerated 1 M  $\text{H}_2\text{SO}_4$  at  $(\text{PDDA}/\text{PVP-TH-Pt})_4$  (a, red),  $(\text{PDDA}/\text{PVP-S-Pt})_4$  (b, black). Scan rate is 20 mV/s.
